# Supplementary material
Source: PubMed Central journal article supplement (PMC10712736)

**Figure S1. Purification and characterization of human and murine neutrophils, related to Figures 1, 2**

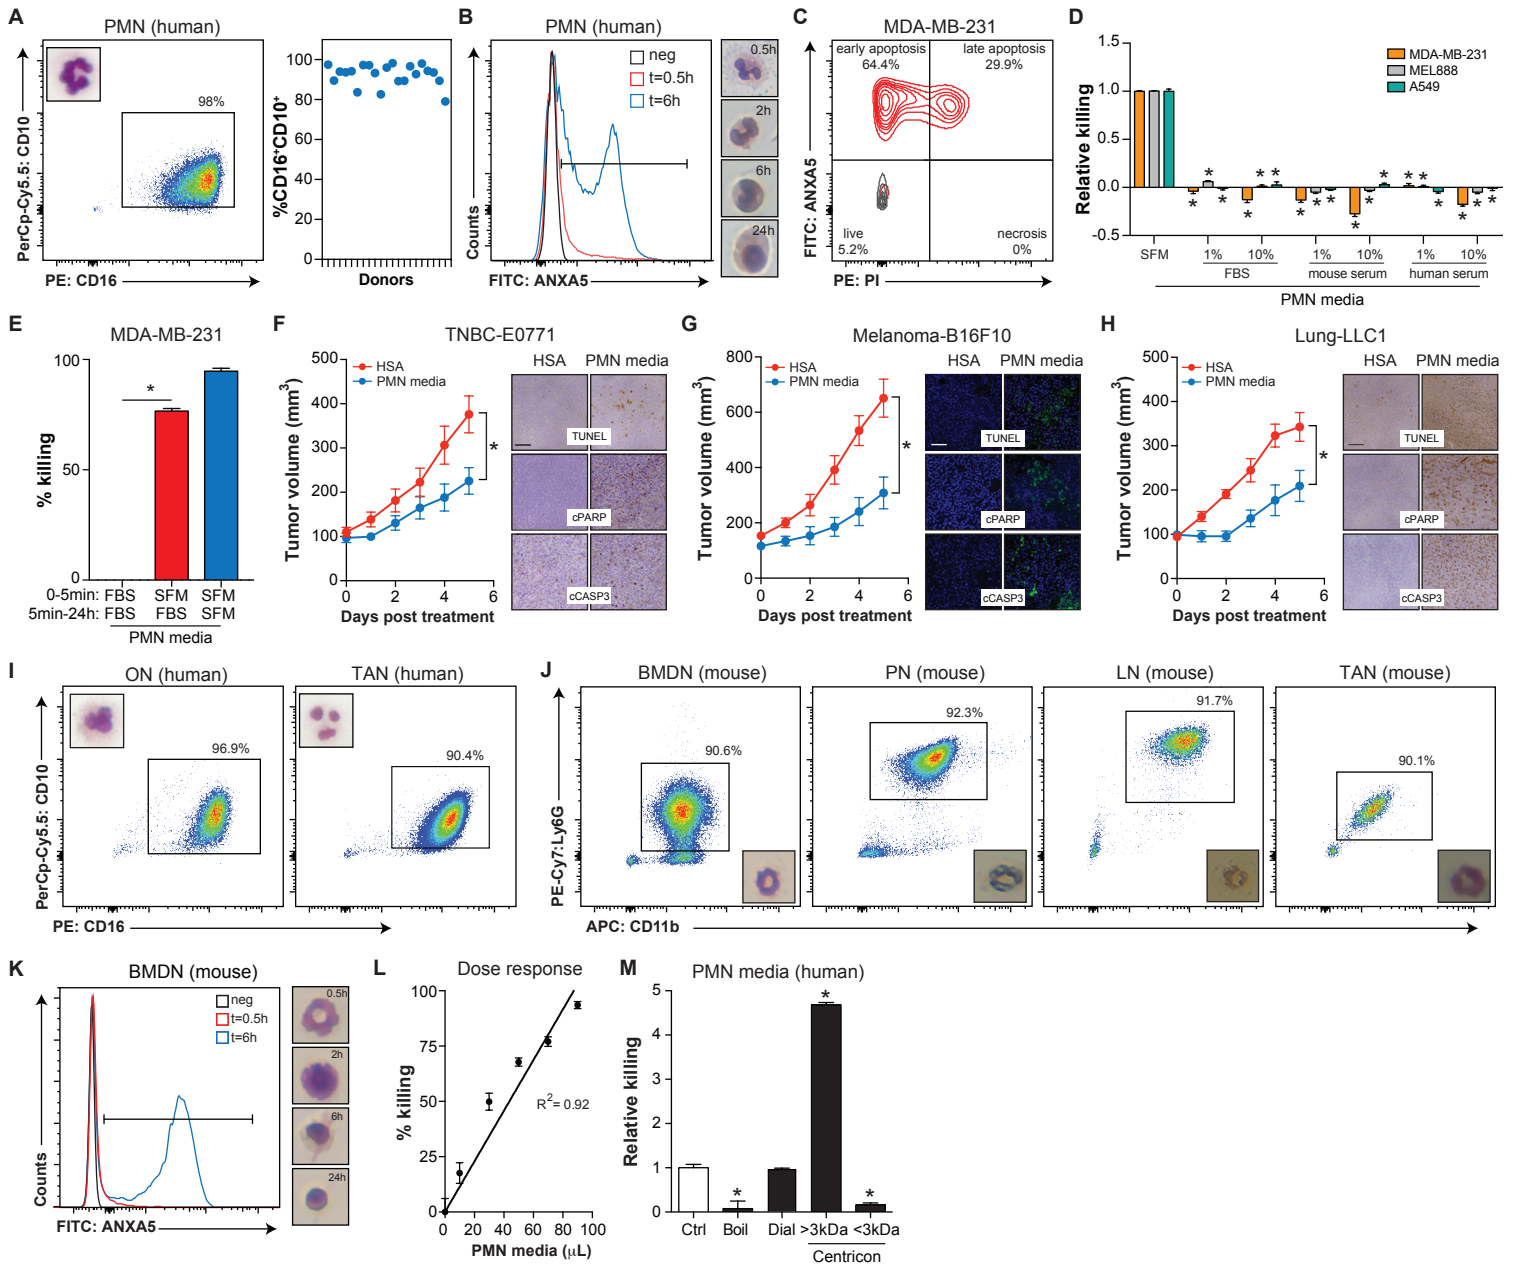

Supplement: NIHMS1929995-supplement-Figure_S1.pdf [file NIHMS1929995-supplement-Figure_S1.pdf]
