# Supplementary material
Source: PubMed Central journal article supplement (PMC10712736)

**Figure S3. ELANE induces a robust killing program in cancer cells, but not in non-cancer cells, related to Figure 4**

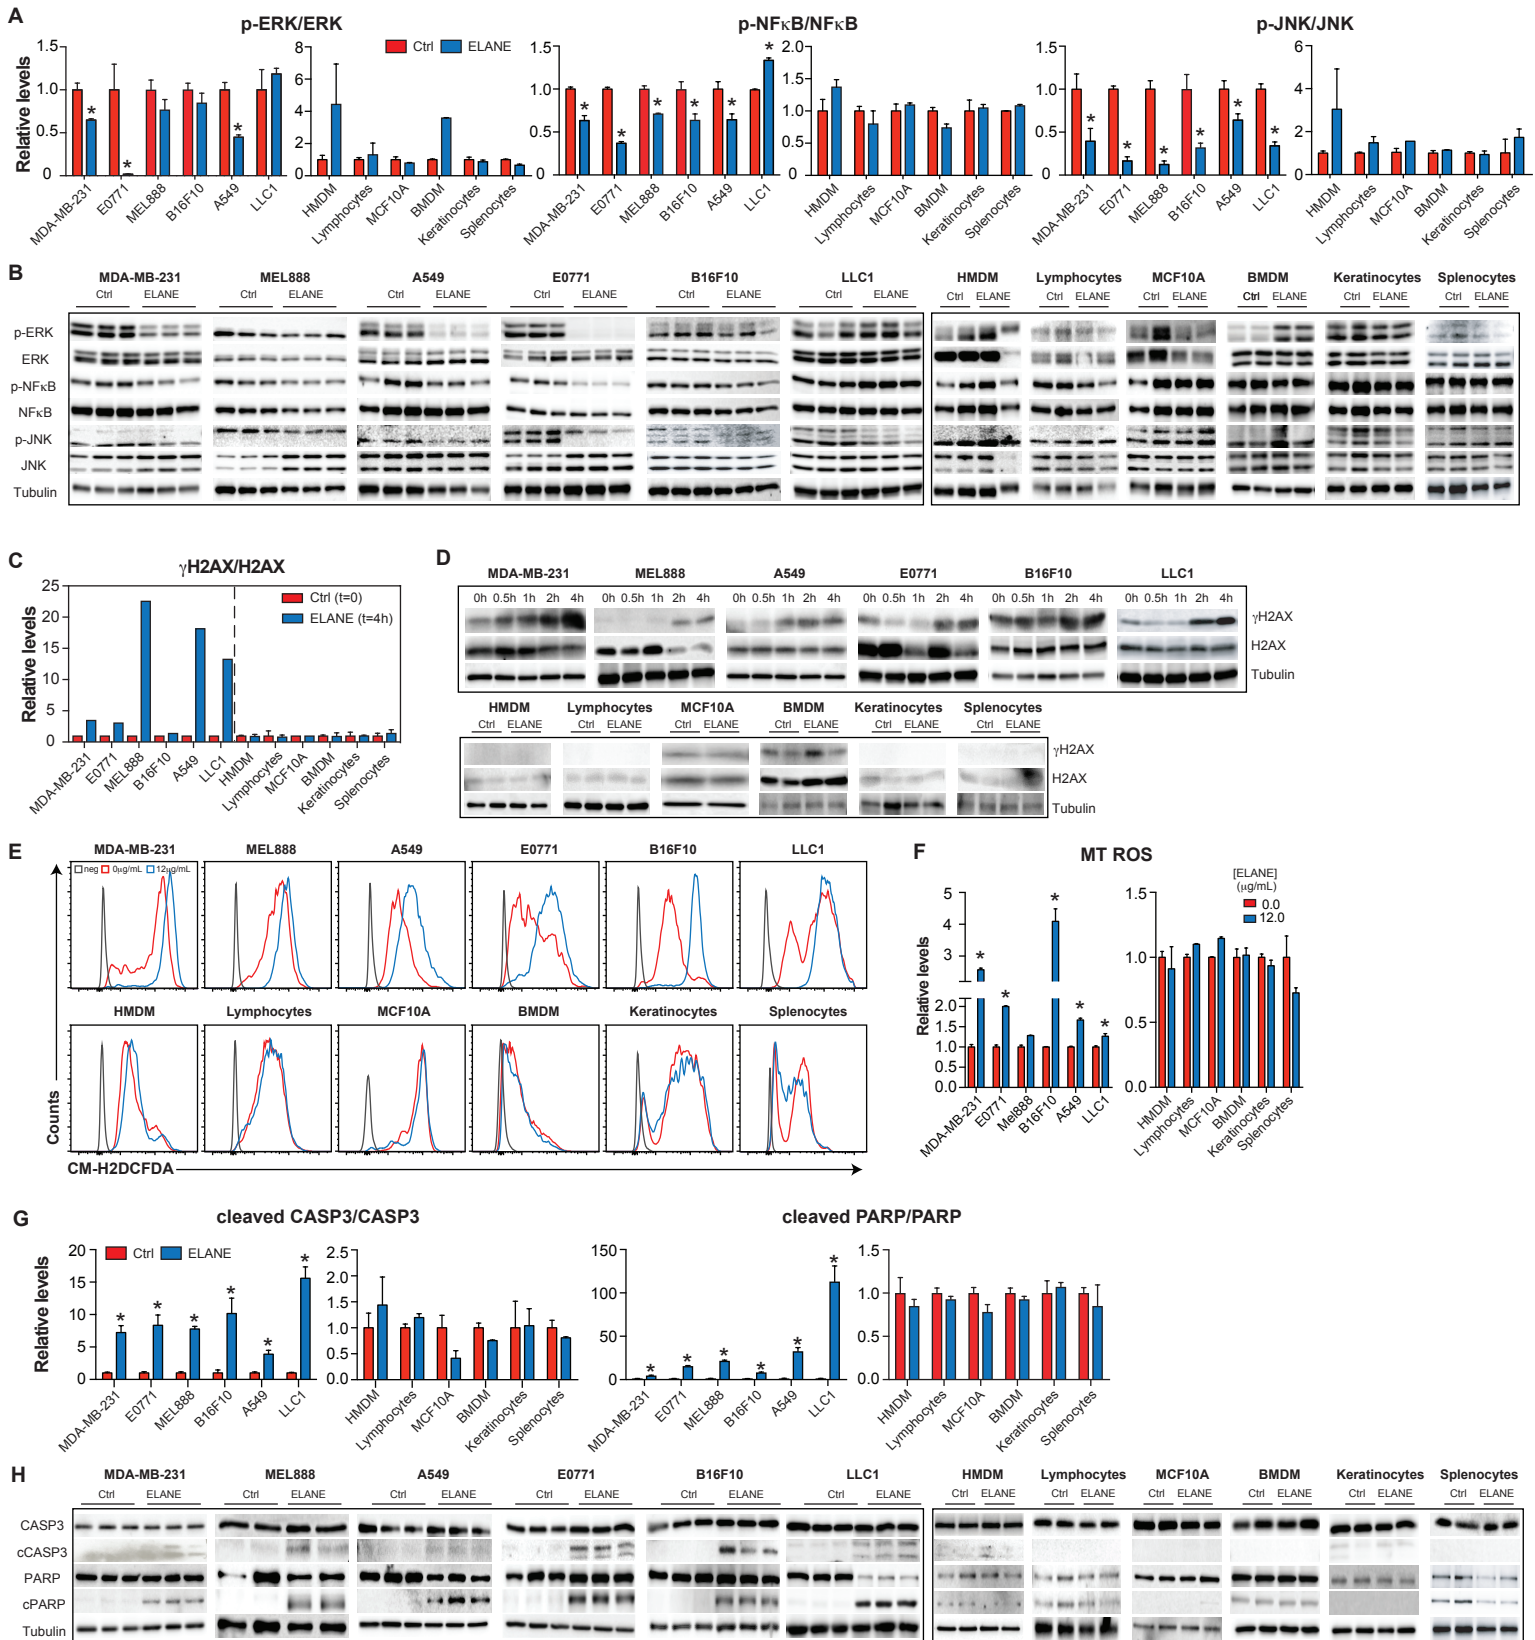

Supplement: NIHMS1929995-supplement-Figure_S3.pdf [file NIHMS1929995-supplement-Figure_S3.pdf]
