# Supplementary material
Source: PubMed Central journal article supplement (PMC10712736)

**Figure S5. DD<sup>ELANE</sup> mimics the ELANE-mediated killing program in cancer cells, but not non-cancer cells, related to Figure 4**

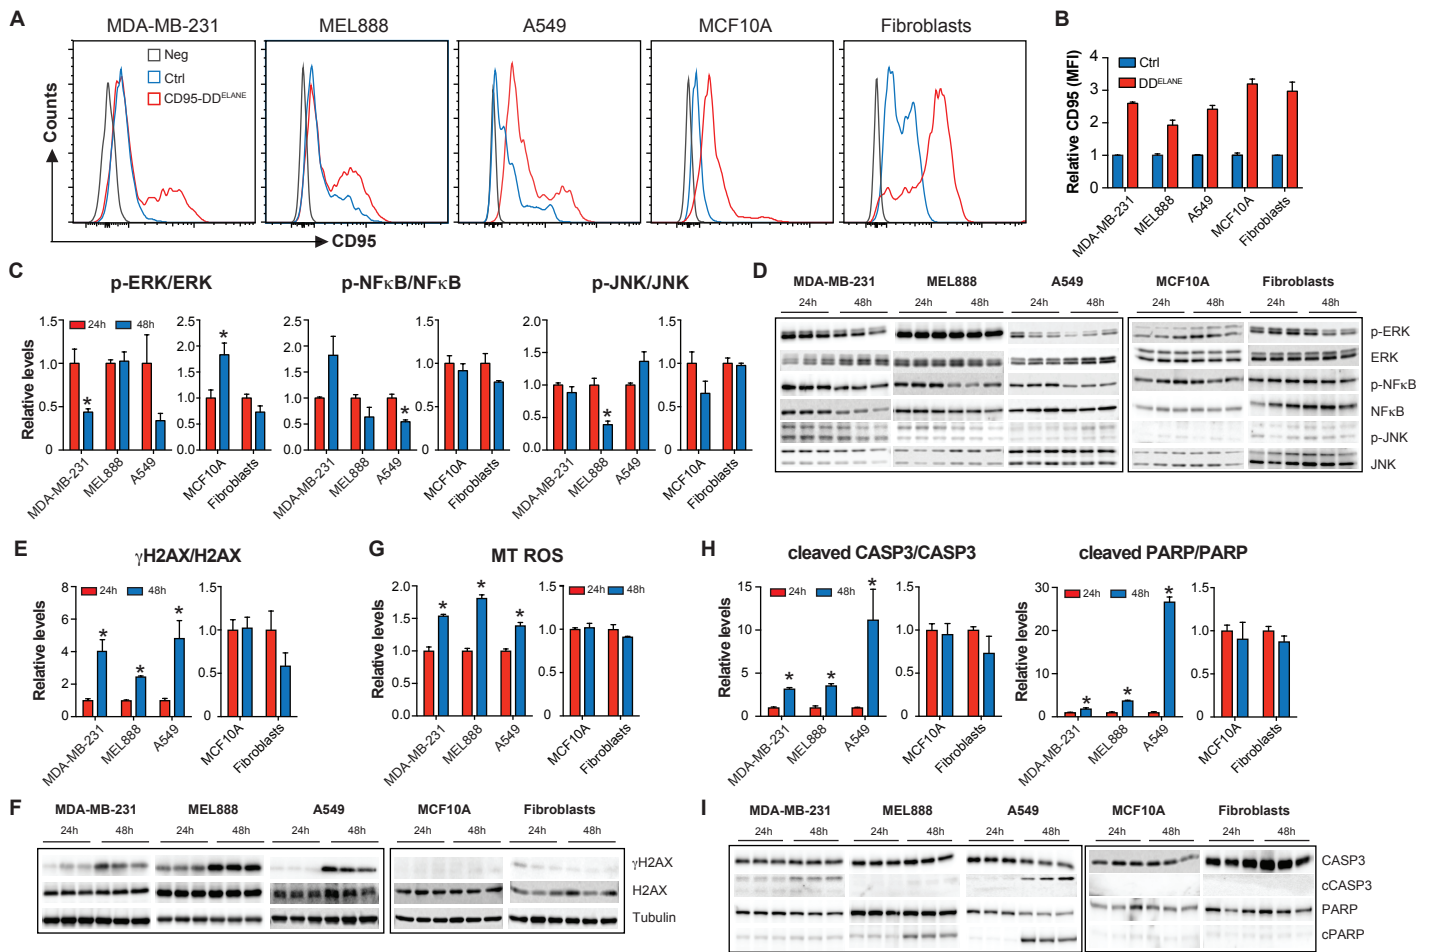

Supplement: NIHMS1929995-supplement-Figure_S5.pdf [file NIHMS1929995-supplement-Figure_S5.pdf]
