# Supplementary material
Source: PubMed Central journal article supplement (PMC10712736)

**Figure S6. ELANE induces a CD8<sup>+</sup> T-cell-mediated abscopal effect in syngeneic models, related to Figure 6**

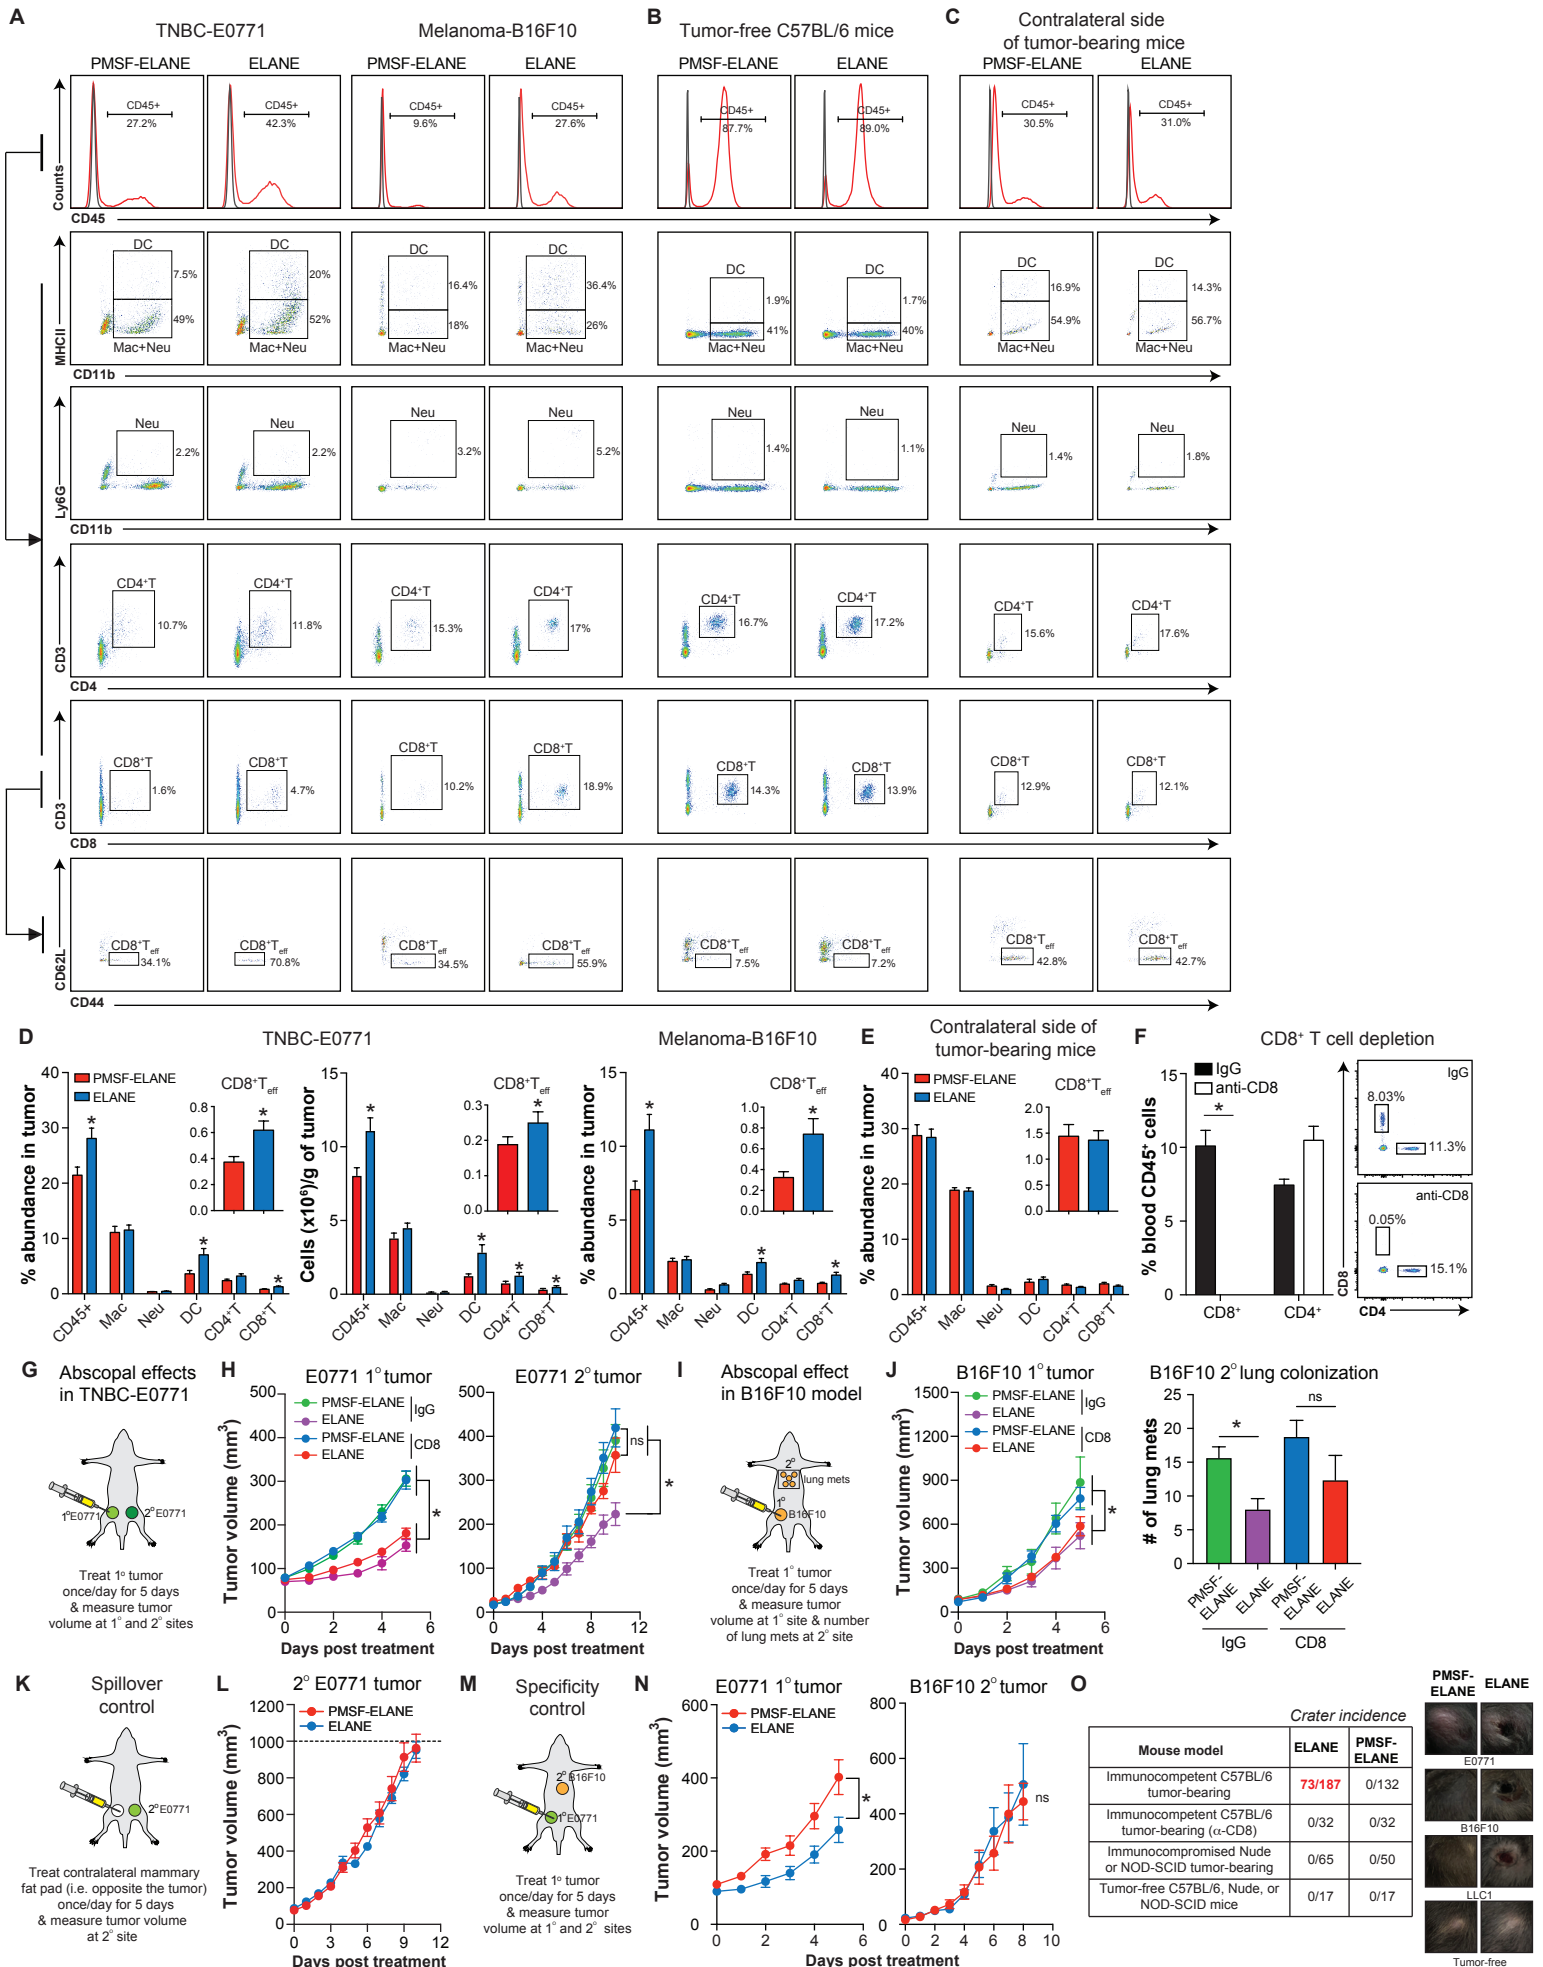

Supplement: NIHMS1929995-supplement-Figure_S6.pdf [file NIHMS1929995-supplement-Figure_S6.pdf]
