# Supplementary material
Source: PubMed Central journal article supplement (PMC10712736)
Supplement: NIHMS1929995-supplement-Tables_S1__S3-4.pdf [file NIHMS1929995-supplement-Tables_S1__S3-4.pdf]

**Table S1. Patient demographics for neutrophil isolation and quantification, related to Figure 1**

| Category | Patient Number             | Diagnosis                                                                                      | Omentum Diagnosis from Pathology Report                                                                        | % Neutrophils in tissue |
|----------|----------------------------|------------------------------------------------------------------------------------------------|----------------------------------------------------------------------------------------------------------------|-------------------------|
| Benign   | 1630                       | Benign: incompetent cervix                                                                     |                                                                                                                | 6.07%                   |
|          | 1633                       | Benign: incompetent cervix                                                                     |                                                                                                                | 9.01%                   |
|          | 1637                       | Benign: incompetent cervix                                                                     |                                                                                                                | 6.02%                   |
|          | 1643                       | Benign: incompetent cervix                                                                     |                                                                                                                | 2.77%                   |
|          | 1678                       | Benign: incompetent cervix                                                                     |                                                                                                                | 10.70%                  |
|          | 1684                       | Benign: incompetent cervix                                                                     |                                                                                                                | 18.10%                  |
|          | 1699                       | Benign: incompetent cervix                                                                     |                                                                                                                | 5.32%                   |
|          | 1701                       | Benign: incompetent cervix                                                                     |                                                                                                                | 17%                     |
|          | 1693                       | Benign: incompetent cervix                                                                     |                                                                                                                | 19.90%                  |
|          | 1725                       | Benign: incompetent cervix                                                                     |                                                                                                                | 14.10%                  |
|          | 1540                       | Benign: incompetent cervix                                                                     |                                                                                                                | 14.40%                  |
|          | 1555                       | Benign: ovarian cyst                                                                           |                                                                                                                | 19.40%                  |
|          | 1709                       | Benign: incompetent cervix                                                                     |                                                                                                                | 20.10%                  |
|          | 1744                       | Benign: incompetent cervix                                                                     |                                                                                                                | 13.10%                  |
|          | 1753                       | Benign: incompetent cervix                                                                     |                                                                                                                | 6.26%                   |
|          | 1784                       | Benign: incompetent cervix                                                                     |                                                                                                                | 5.05%                   |
|          | 1826                       | Benign: incompetent cervix                                                                     |                                                                                                                | 6.03%                   |
|          | 1828                       | Benign: incompetent cervix                                                                     |                                                                                                                | 1.04%                   |
|          | 1899                       | Benign: incompetent cervix                                                                     |                                                                                                                | 16.70%                  |
|          | 1887                       | Benign: incompetent cervix                                                                     |                                                                                                                | 7.17%                   |
|          | 1923                       | Benign: incompetent cervix                                                                     |                                                                                                                | 16.90%                  |
|          | 1941                       | Benign: incompetent cervix                                                                     |                                                                                                                | 9.59%                   |
| 1800     | Benign: incompetent cervix |                                                                                                | 28.30%                                                                                                         |                         |
| 1818     | Benign: simple serous cyst |                                                                                                | 6.93%                                                                                                          |                         |
| Pre-Mets | 1691                       | Cancer: stage IA Intestinal-type (colonic-type) adenocarcinoma within a mature cystic teratoma | Omental adipose tissue with reactive changes including focal mesothelial hyperplasia, no tumor                 | 67.40%                  |
|          | 1664                       | Cancer: stage IB serous borderline tumor of the ovary                                          | Fibroadipose tissue negative for tumor                                                                         | 39.60%                  |
|          | 1559                       | Cancer: Recurrent mucinous carcinoma of the ovary                                              | Fibroadipose and lymphoid tissue with no metastasis. - three lymph nodes, without diagnostic abnormality (0/3) | 63.80%                  |
|          | 1663                       | Cancer: stage IC2 clear cell carcinoma of the left ovary                                       | Fibroadipose tissue negative for tumor                                                                         | 52.90%                  |

|        |      |                                                                        |                                                           |        |
|--------|------|------------------------------------------------------------------------|-----------------------------------------------------------|--------|
|        | 1730 | Low grade well-differentiated type paraganglioma                       | Fibrovascular tissue without diagnostic abnormality       | 62.70% |
|        |      | Serous cystadenofibroma of right ovary                                 |                                                           |        |
|        |      | Focal complex hyperplasia with atypia of endometrium                   |                                                           |        |
| Tumors | 1536 | Cancer: Stage IIIC high grade papillary serous carcinoma of left ovary | Metastatic serous carcinoma                               | 23.10% |
|        | 1700 | Cancer: stage IIIC high grade serous carcinoma of the fallopian tube   | High grade serous carcinoma involving fibroadipose tissue | 34.10% |

Patient demographics for human neutrophil sources, including omental adipose tissue neutrophils (ONs) from non-cancer patients (n=24), tumor-associated neutrophils (TANs) from ovarian cancer patients with metastatic tumors (n=2), and ONs from omental adipose tissue (primary metastatic site) of pre-metastatic ovarian cancer patients (n=5).

**Table S3. Shotgun proteomics analysis of serine protease inhibitors in murine PN and human PMN media, related to Figure 3**

| Protein annotation          | Human PMN media                          |          |                        |               |
|-----------------------------|------------------------------------------|----------|------------------------|---------------|
|                             | Protein quantification (spectral counts) |          | % share of spectrum ID |               |
|                             | Donor 1                                  | Donor 2  | Donor 1                | Donor 2       |
| sp P01009 A1AT_HUMAN        | 3                                        | 7        | 0.014%                 | 0.032%        |
| sp P30740 ILEU_HUMAN        | 37                                       | 50       | 0.177%                 | 0.228%        |
| sp P30086 PEBP1_HUMAN       | 32                                       | 29       | 0.153%                 | 0.132%        |
| sp P01023 A2MG_HUMAN        | 3                                        | 6        | 0.014%                 | 0.027%        |
| <b>sp P03973 SLPI_HUMAN</b> | <b>0</b>                                 | <b>0</b> | <b>0.000%</b>          | <b>0.000%</b> |
| Total Counts                | 20923                                    | 21939    |                        |               |

| Protein annotation          | Mouse PN media                           |          |                        |               |
|-----------------------------|------------------------------------------|----------|------------------------|---------------|
|                             | Protein quantification (spectral counts) |          | % share of spectrum ID |               |
|                             | Mouse 1                                  | Mouse 2  | Mouse 1                | Mouse 2       |
| sp P07758 A1AT1_MOUSE       | 3                                        | 8        | 0.012%                 | 0.035%        |
| sp Q9D154 ILEUA_MOUSE       | 75                                       | 82       | 0.300%                 | 0.360%        |
| sp P70296 PEBP1_MOUSE       | 1                                        | 9        | 0.004%                 | 0.040%        |
| sp Q61838 A2M_MOUSE         | 16                                       | 19       | 0.064%                 | 0.083%        |
| <b>sp P97430 SLPI_MOUSE</b> | <b>16</b>                                | <b>9</b> | <b>0.064%</b>          | <b>0.040%</b> |
| Total Counts                | 24979                                    | 22774    |                        |               |

Human PMNs were purified from healthy donors (n=2). Mouse PNs were isolated 7h post thioglycolate-injection (n=2). Serine protease inhibitors were quantified by spectral counting and normalized to the number of total peptides identified per run to obtain a % share of spectrum ID.

**Table S4. Shotgun proteomics analysis of FLAG-DD<sup>ELANE</sup> in cancer and non-cancer cells, related to Figure 5**

| Protein annotation  | Protein quantification (spectral counts: H1/CD95) |      |        |        |             |
|---------------------|---------------------------------------------------|------|--------|--------|-------------|
|                     | MDA-MB-231                                        | A549 | MEL888 | MCF10A | Fibroblasts |
| sp P07305 H10_HUMAN | 2.0                                               | 1.0  | 0.9    | 0.4    | 0.2         |
| sp P16403 H12_HUMAN | 4.0                                               | 2.0  | 2.0    | 0.6    | 0.5         |
| sp P10412 H14_HUMAN | 4.0                                               | 7.0  | 5.4    | 1.6    | 1.4         |
| sp P16401 H15_HUMAN | 0.0                                               | 1.0  | 3.7    | 0.9    | 0.7         |

Cancer and non-cancer cells were transduced with FLAG-DD<sup>ELANE</sup>, cell lysates were collected, and immunoprecipitated with anti-FLAG antibody magnetic beads. Putative binding proteins were identified by mass spectrometry. Proteins were quantified by spectral counting and expressed relative to CD95 levels.
