# Supplementary material
Source: PubMed Central journal article supplement (PMC10712736)

**Figure S2. ECP is a type II allosteric activator of ELANE, related to Figure 2**

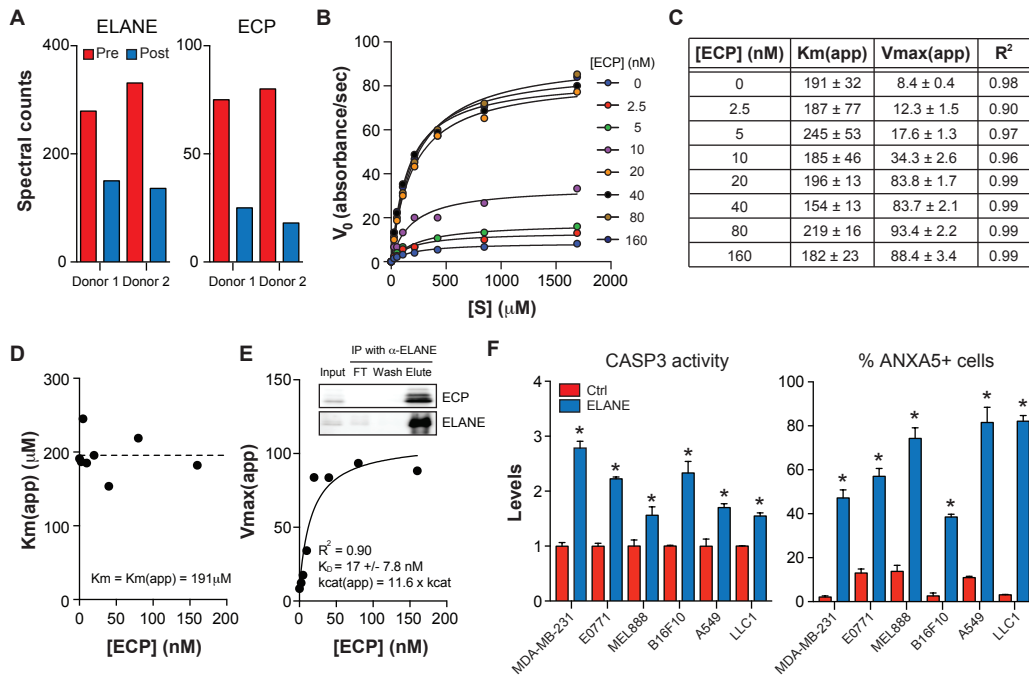

Supplement: NIHMS1929995-supplement-Figure_S2.pdf [file NIHMS1929995-supplement-Figure_S2.pdf]

**Figure S4. ELANE cleaves CD95 to selectively kill cancer cell, related to Figure 4.**

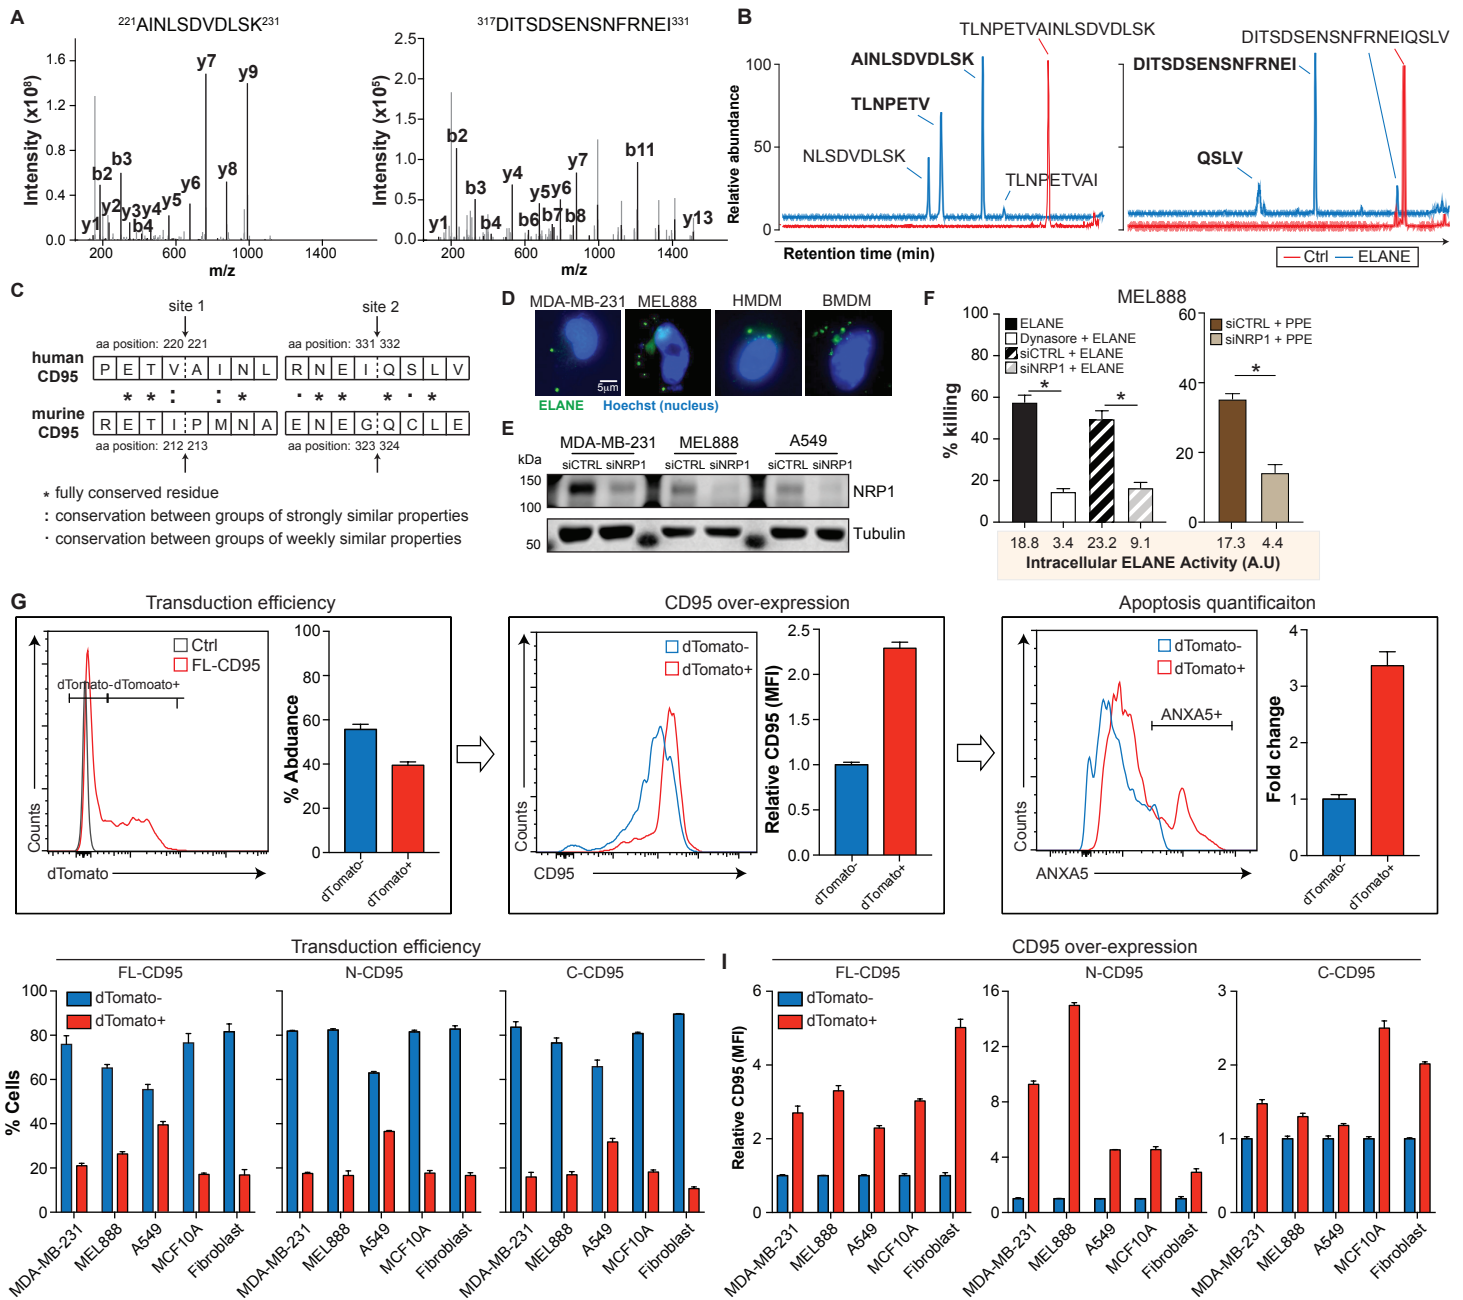

Supplement: NIHMS1929995-supplement-Figure_S4.pdf [file NIHMS1929995-supplement-Figure_S4.pdf]

**Figure S7. PPE exhibits minimal toxicity in tumor-free mice, related to Figure 7**

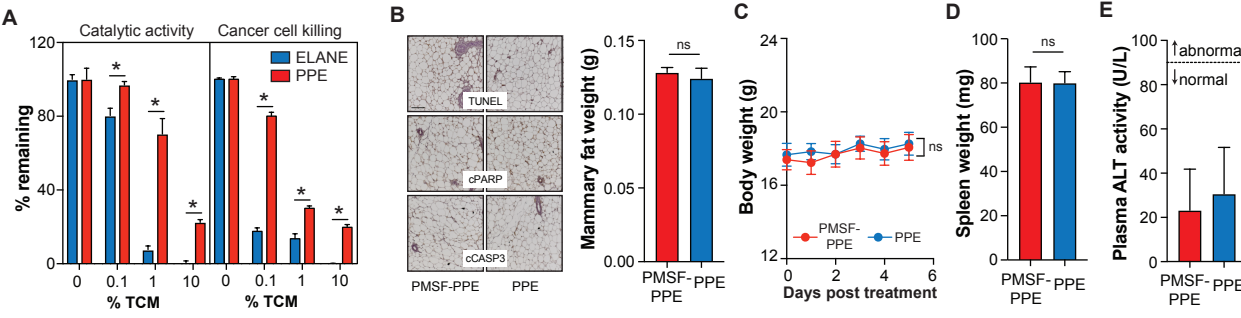

Supplement: NIHMS1929995-supplement-Figure_S7.pdf [file NIHMS1929995-supplement-Figure_S7.pdf]
